# Supplementary material for: Sintering-Based In-Situ Synthesis and Characterization by TEM of Noble Metal Nanoparticles for Ceramic Glaze Color Control
Source: MDPI journal article supplement (doi:10.3390/nano11082103), 2021-08-19
Supplement: s1 [file s1]

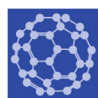

# Sintering-Based In-Situ Synthesis and Characterization by TEM of Noble Metal Nanoparticles for Ceramic Glaze Color Control

Karthik Lalwani, Nathan Dinh, Michael C. Leopold and Ryan H. Coppage \*

Department of Chemistry, Gottwald Center for the Sciences, University of Richmond, Richmond, VA 23173, USA; karthik.lalwani@richmond.edu (K.L.); nathan.dinh@richmond.edu (N.D.); mleopold@richmond.edu (M.C.L.)

\* Correspondence: rcoppage@richmond.edu

## Contents:

- **Figure S1.** Chromaticity diagrams and CIE Lab color measurements for the 100:0 (a), 80:20 (b), 60:40 (c), 40:60 (d), 20:80 (e), and 0:100 (f) oxidation samples.
- **Figure S2.** TEM imaging and histogram analysis for all salt ratios of glaze fired in oxidative environment.
- **Figure S3.** Chromaticity diagrams and CIE Lab color measurements for the 100:0 (a), 80:20 (b), 60:40 (c), 40:60 (d), 20:80 (e), and 0:100 (f) reduction samples.
- **Figure S4.** TEM imaging and histogram analysis for all salt ratios of glaze fired in reductive environment.
- **Figure S5.** TEM-EDS elemental mapping of 80:20 reduction sample.
- **Figure S6.** In-house TEM imaging of predominant silver 20:80 oxidation sample (Figure S4) after 48+ hours.
- **Figure S7.** In-house TEM imaging of 0:100 reduction sample immediately versus after 48+ hours.

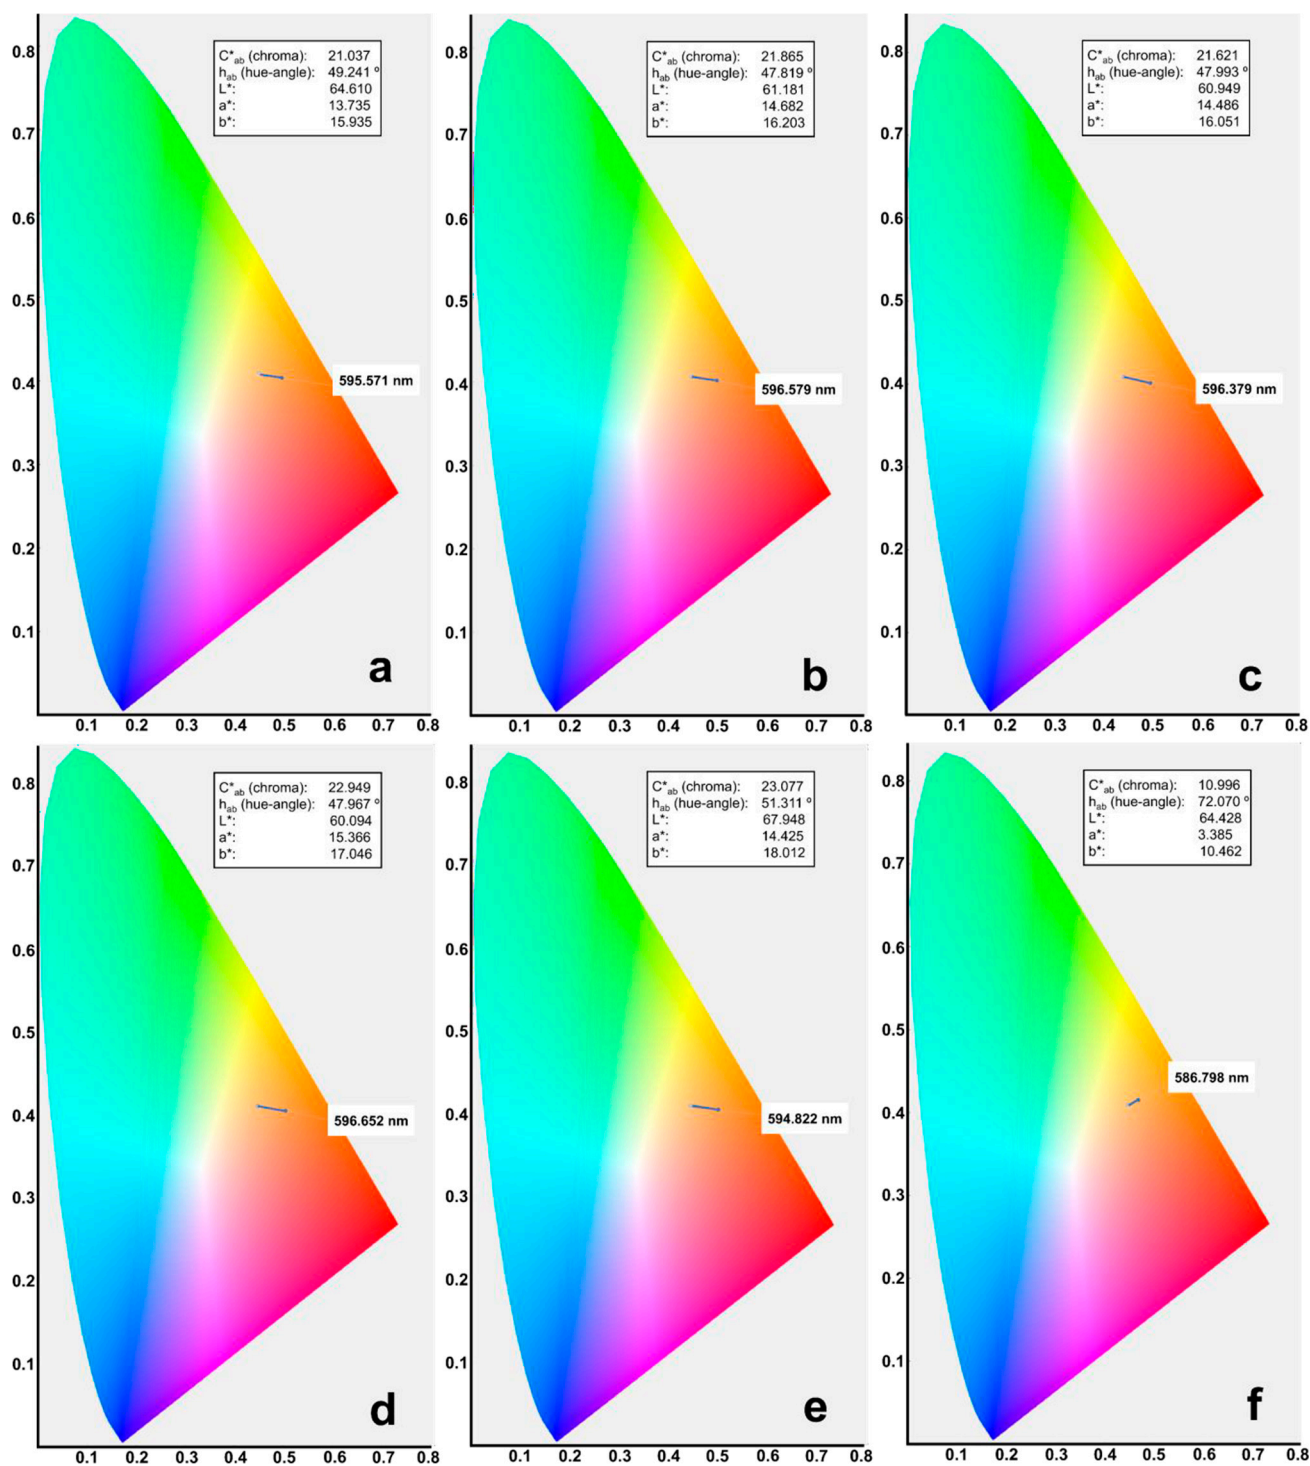

**Figure S1.** Chromaticity diagrams and CIE Lab color measurements for the 100:0 (a), 80:20 (b), 60:40 (c), 40:60 (d), 20:80 (e), and 0:100 (f) oxidation samples.

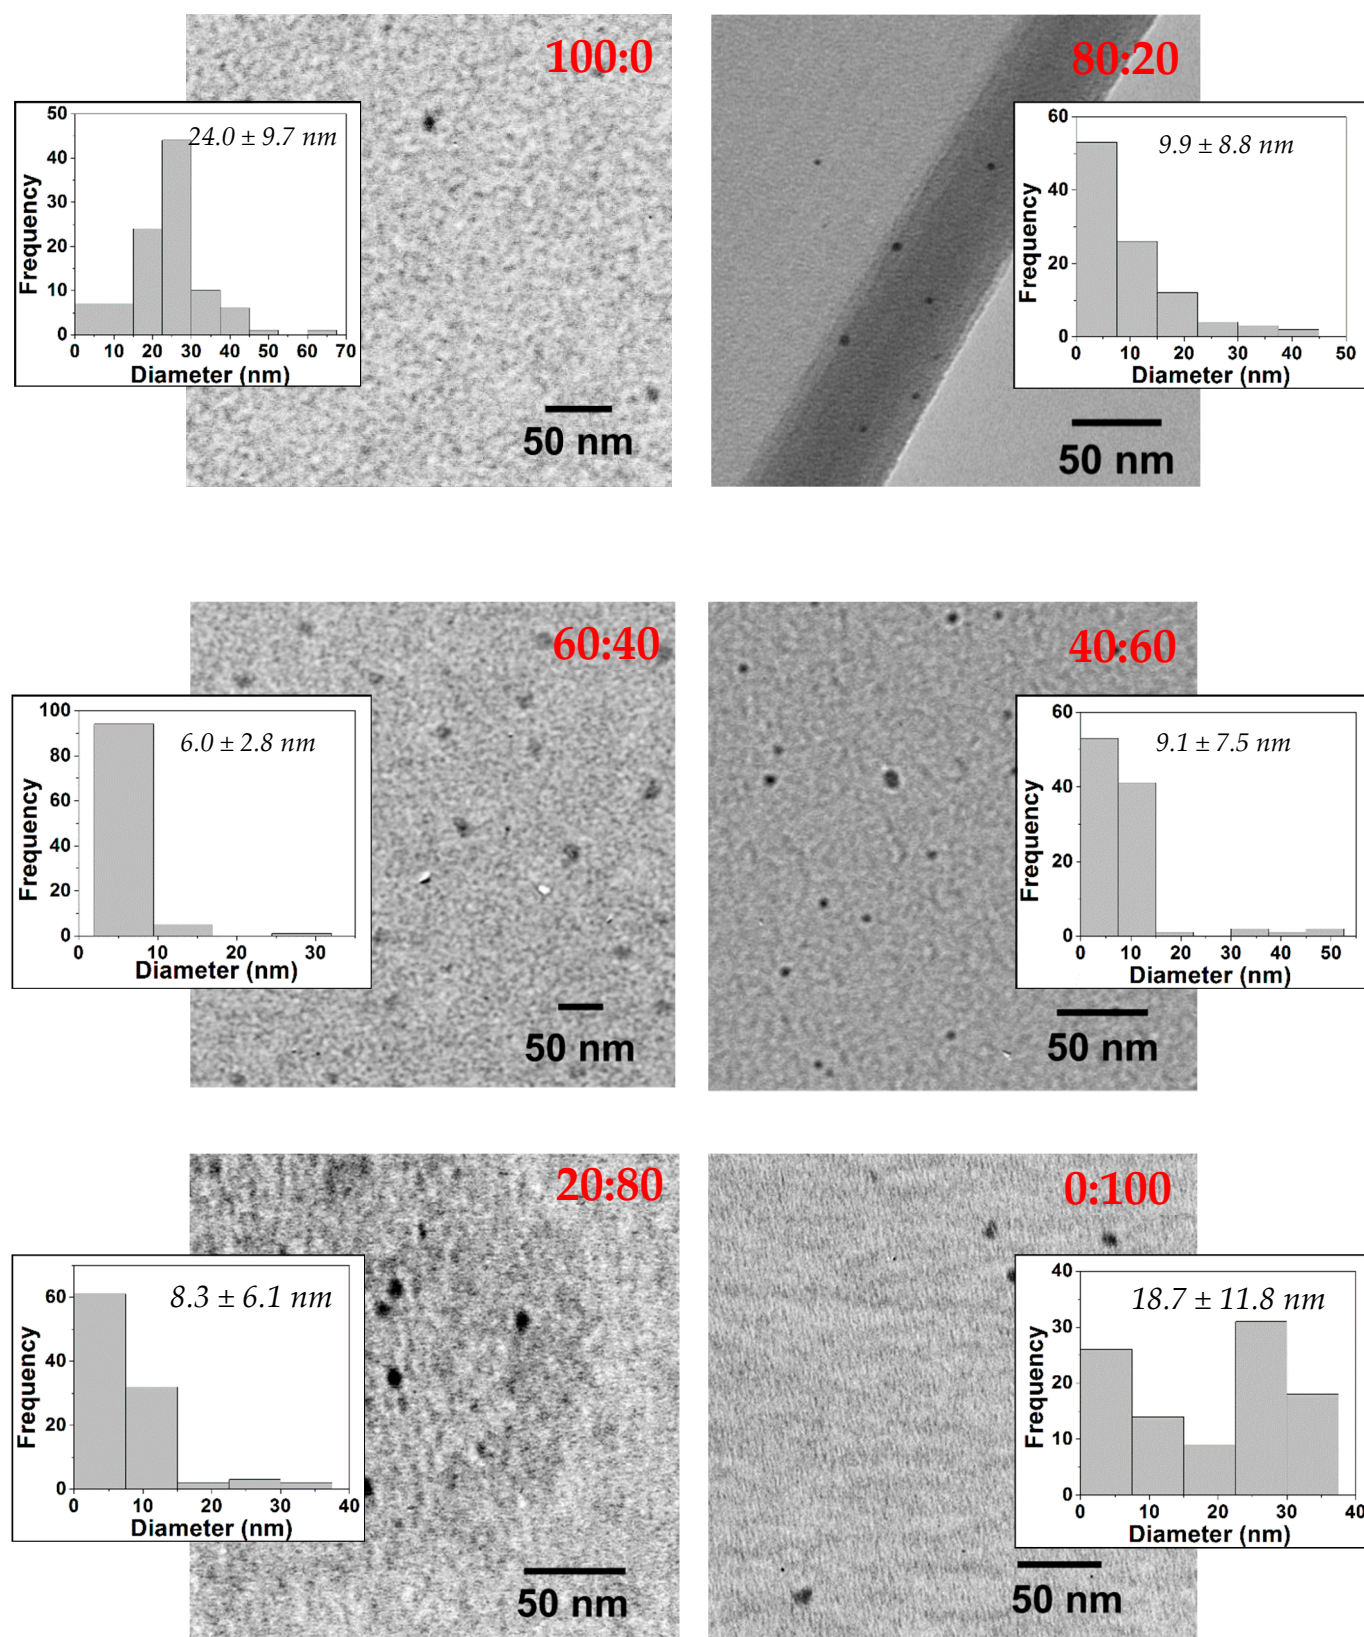

**Figure S2.** Typical TEM images for **oxidative firing** samples with varying Au:Ag salt ratios and corresponding histogram analysis of average core size with standard deviation (insets).



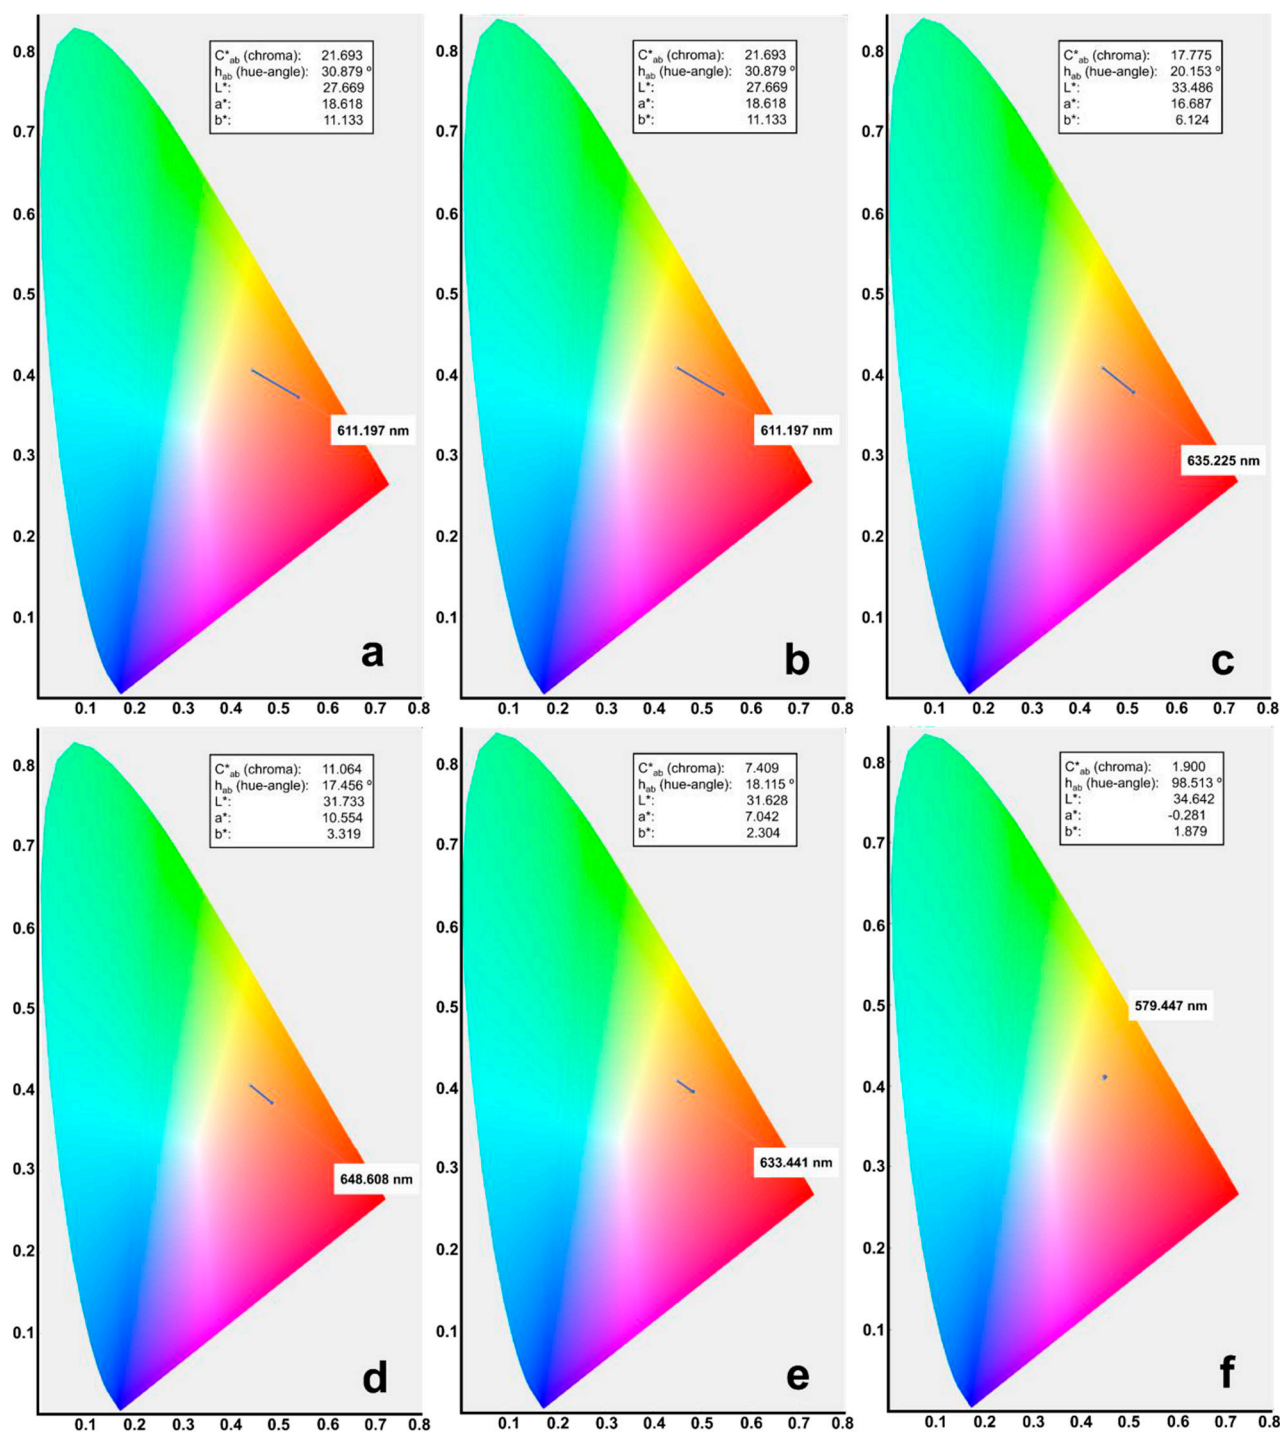

**Figure S3.** Chromaticity diagrams and CIE Lab color measurements for the 100:0 (a), 80:20 (b), 60:40 (c), 40:60 (d), 20:80 (e), and 0:100 (f) reduction samples.



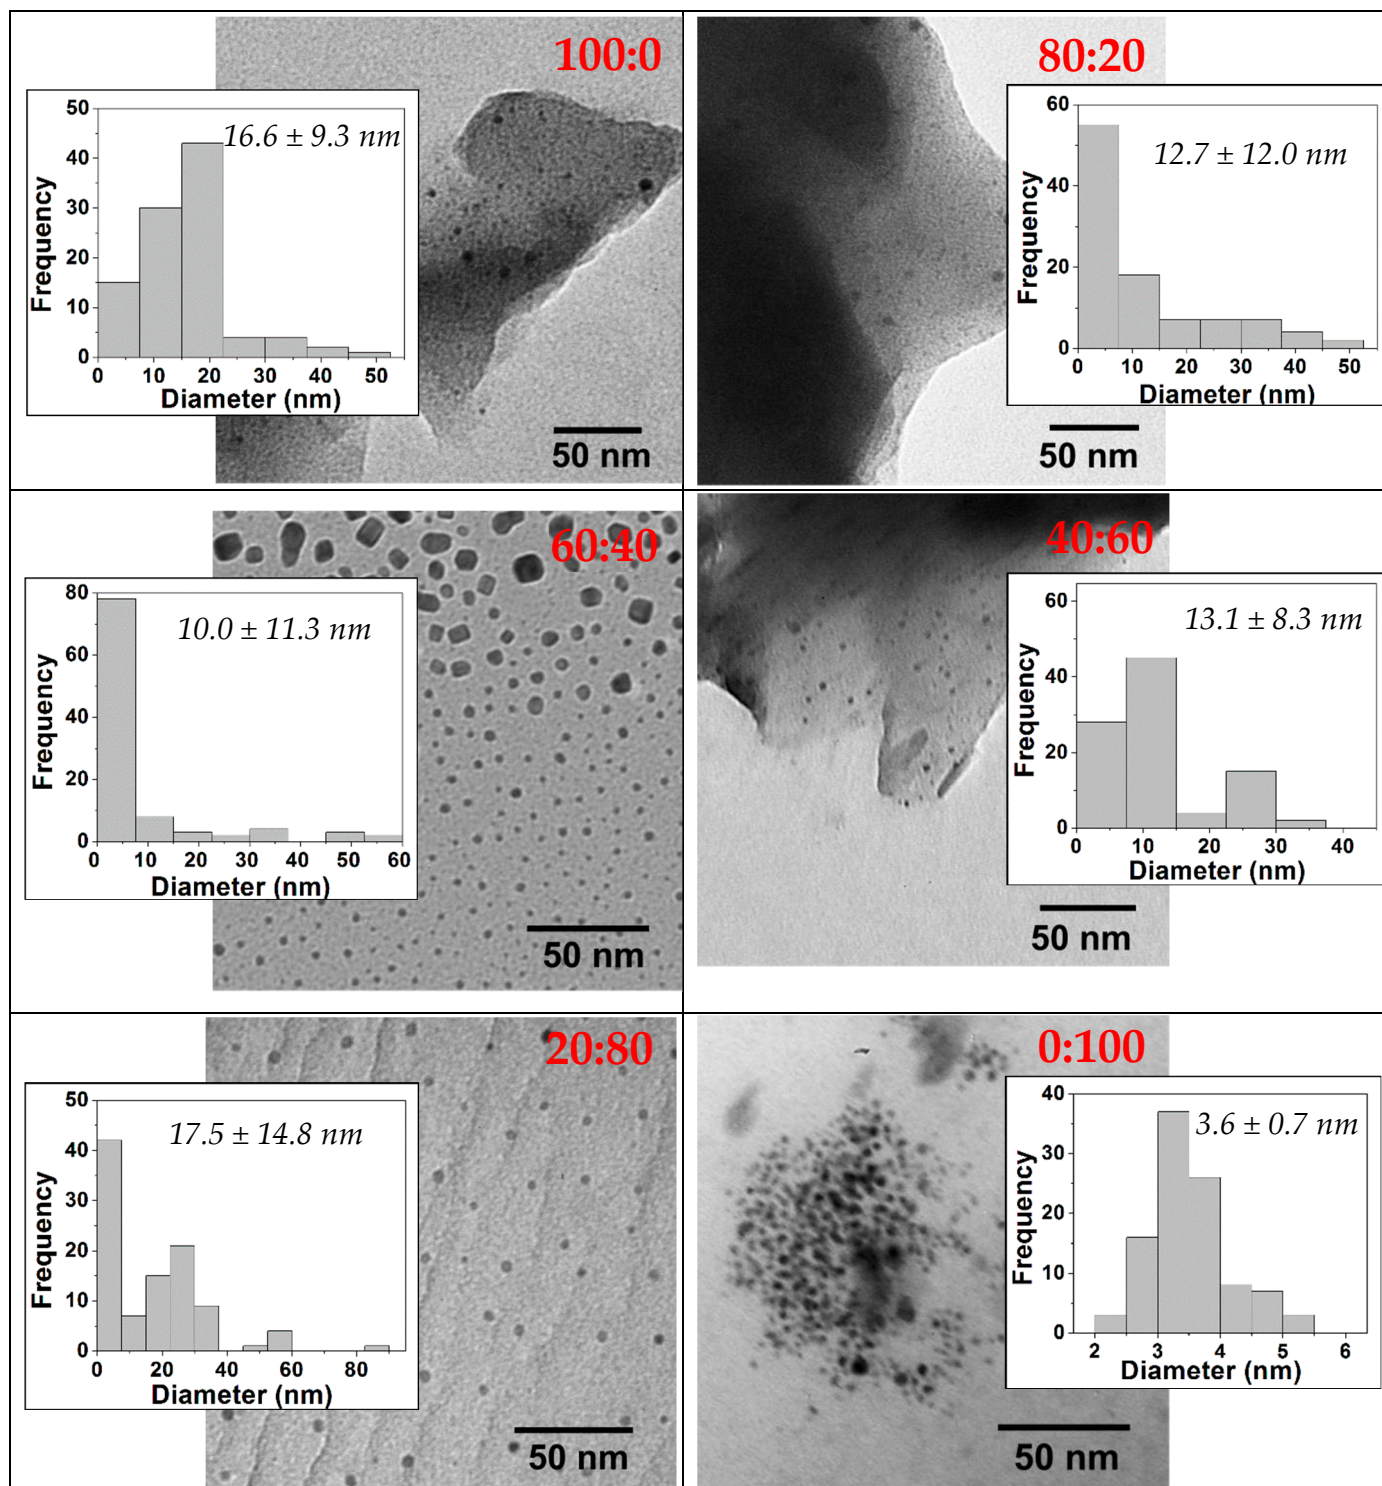

**Figure S4.** Typical TEM images for **reductive firing** samples with varying Au:Ag salt ratios and corresponding histogram analysis of average core size with standard deviation (*insets*).

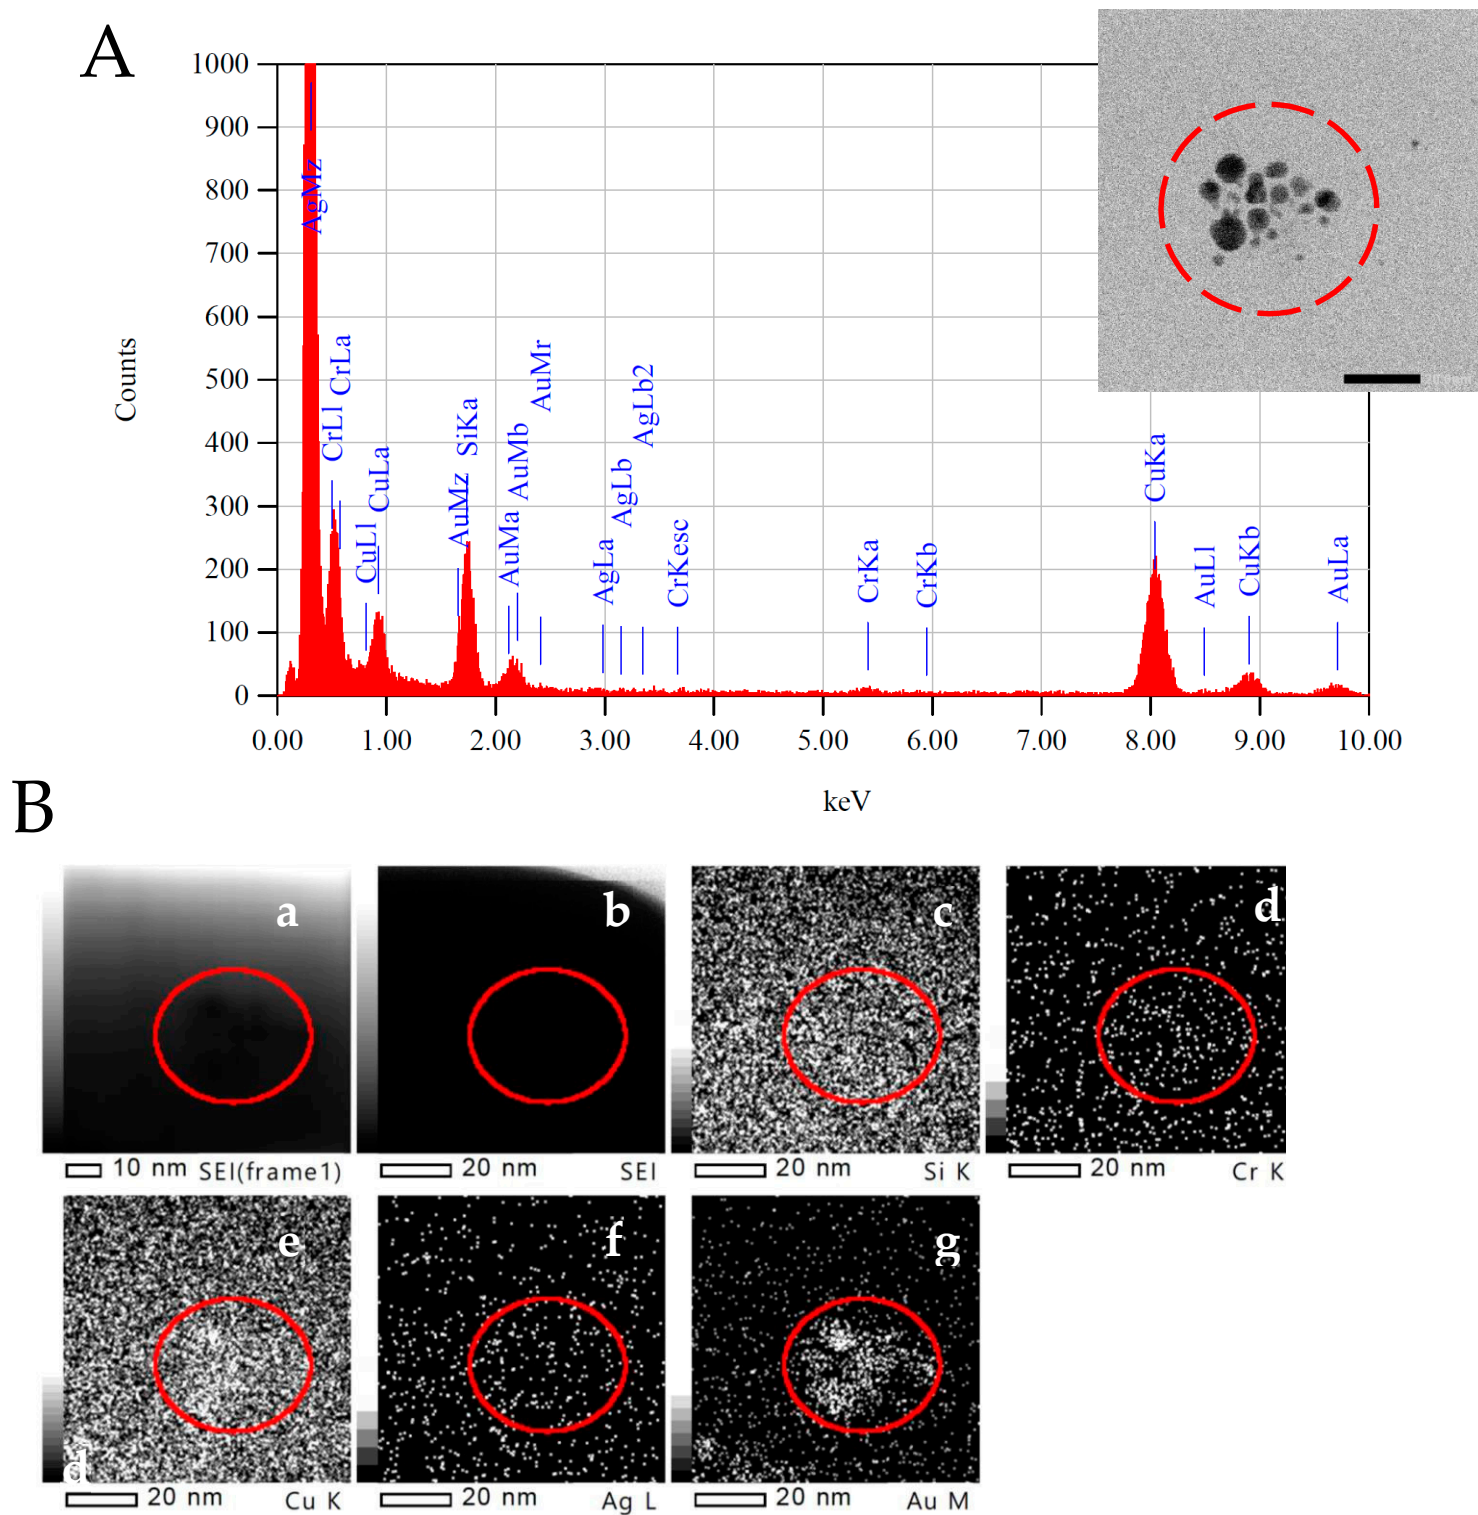

**Figure S5.** EDS analysis of field with NPs for 80:20 (area designed in image (inset) and **(B)** corresponding elemental mapping including (a) (b) carbon overlays, (c) Si, (d) Cr, (e) Cu, (f) Ag, and (g) Au. Note: SM-3, B-f (Ag) and SM-3B-g (Au) are also represented in Figure 7. It should be noted that chromium is a common impurity in mined glaze ingredients and the TEM grid is copper, so both are expected to be present.

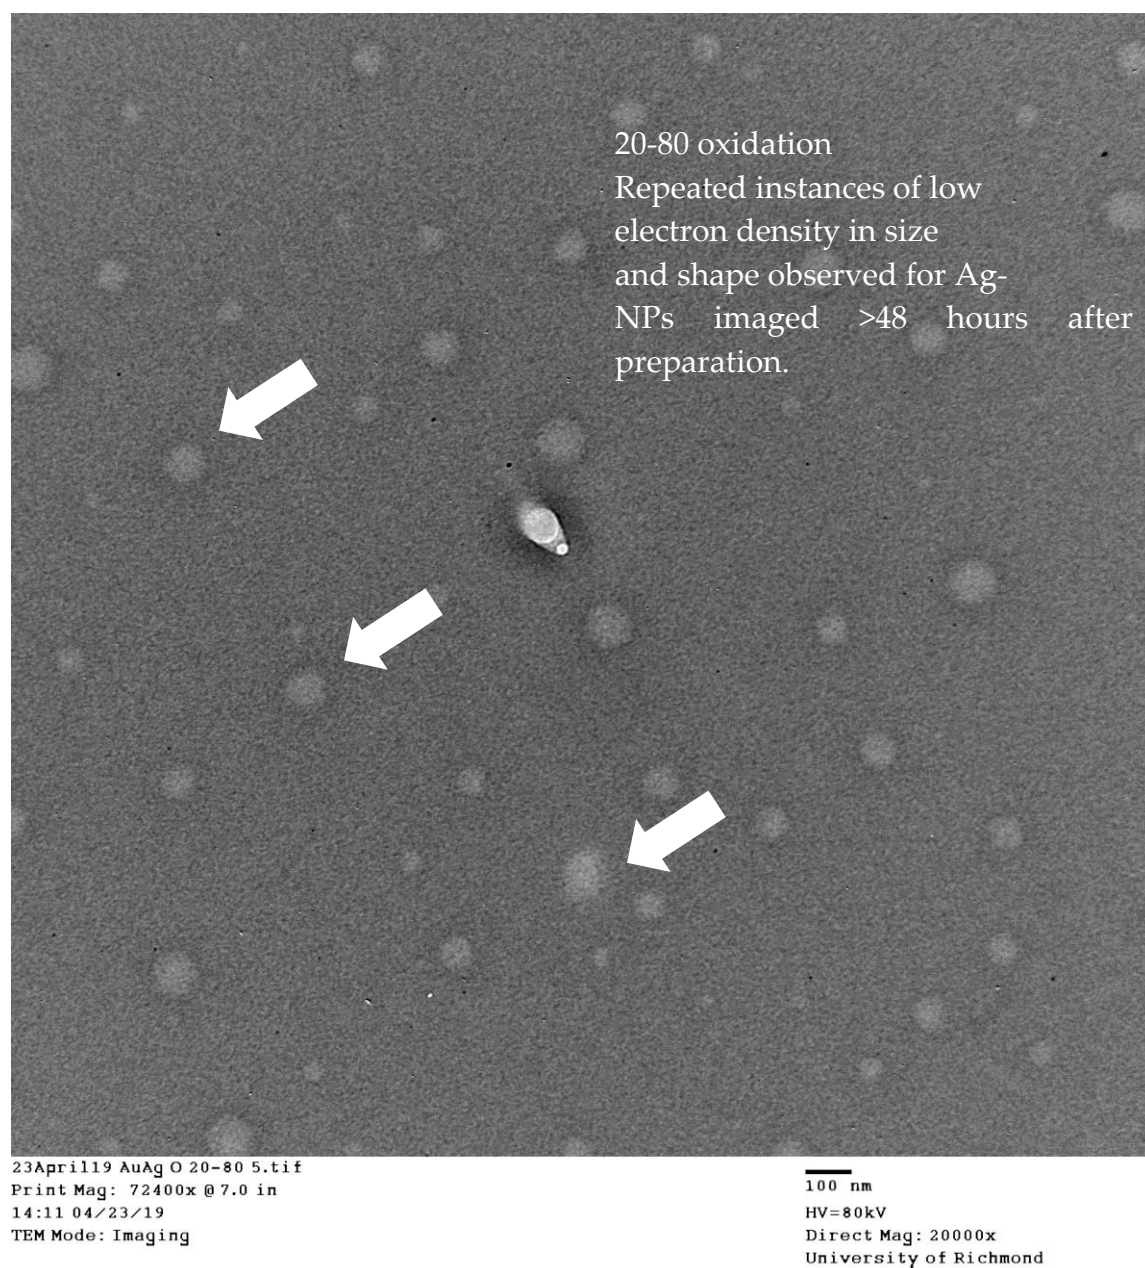

**Figure S6.** TEM imaging for 20:80 reduction sample showing low electron density holes and the corresponding absence of high electron density Ag NPs for a sample that was not immediately imaged.



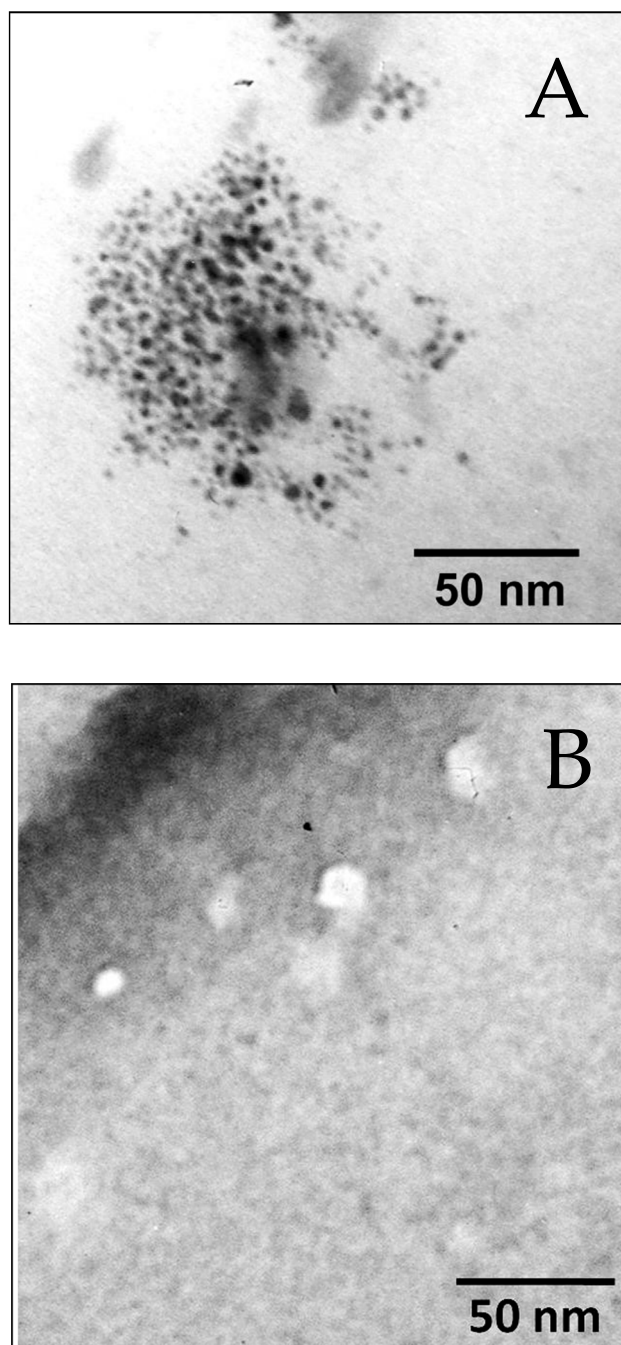

**Figure S7.** TEM imaging for 0:100 reduction sample (A) as prepared showing presence of Ag-NPs versus (B) the same sample imaged > 48 hours after being prepared and illustrating the absence of Ag-NPs (presence of low electron density holes with same dimensions as previously imaged Ag-NPs).
